# Supplementary material for: SoilGrids 2.0: producing quality-assessed soil information for theglobe
Source: Copernicus journal article supplement (doi:10.5194/soil-2020-65), 2020-11-09
Supplement: Supplementary file 1 [file soil-2020-65-supplement.pdf]

# Supplementary material: SoilGrids 2.0: producing quality-assessed soil information for the globe

Luis M. de Sousa<sup>1</sup>, Laura Poggio<sup>1</sup>, Niels H. Batjes<sup>1</sup>, Gerard B. M. Heuvelink<sup>1</sup>, Bas Kempen<sup>1</sup>, Eloi Ribeiro<sup>1</sup>, and David Rossiter<sup>1</sup>

<sup>1</sup>ISRIC - World Soil Information - Wageningen (NL)

## 1 Geographic density of observations

The number of locations with at least one observation for each of the soil properties were summed in each cell of an ISEAG grid of resolution 6 and aperture 3 (see section on the stratification methodology in the main paper for further details).

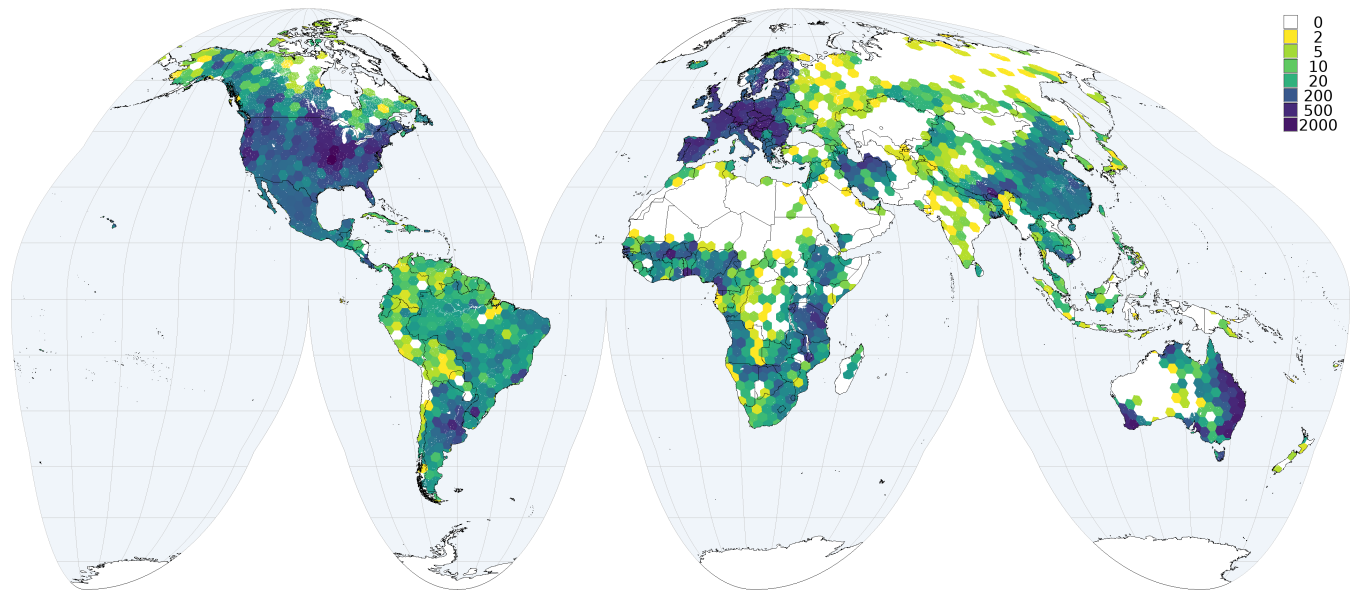

**Figure S1.** Number of observations for soil organic carbon.

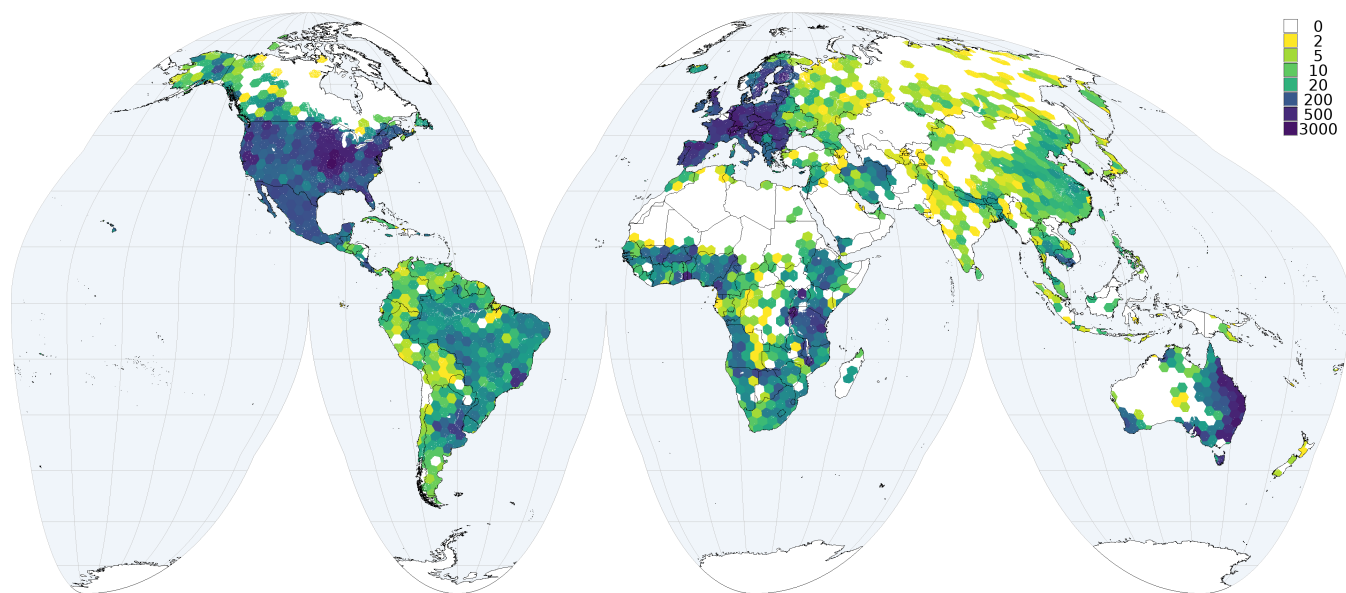

**Figure S2.** Number of observations for soil pH<sub>water</sub>.

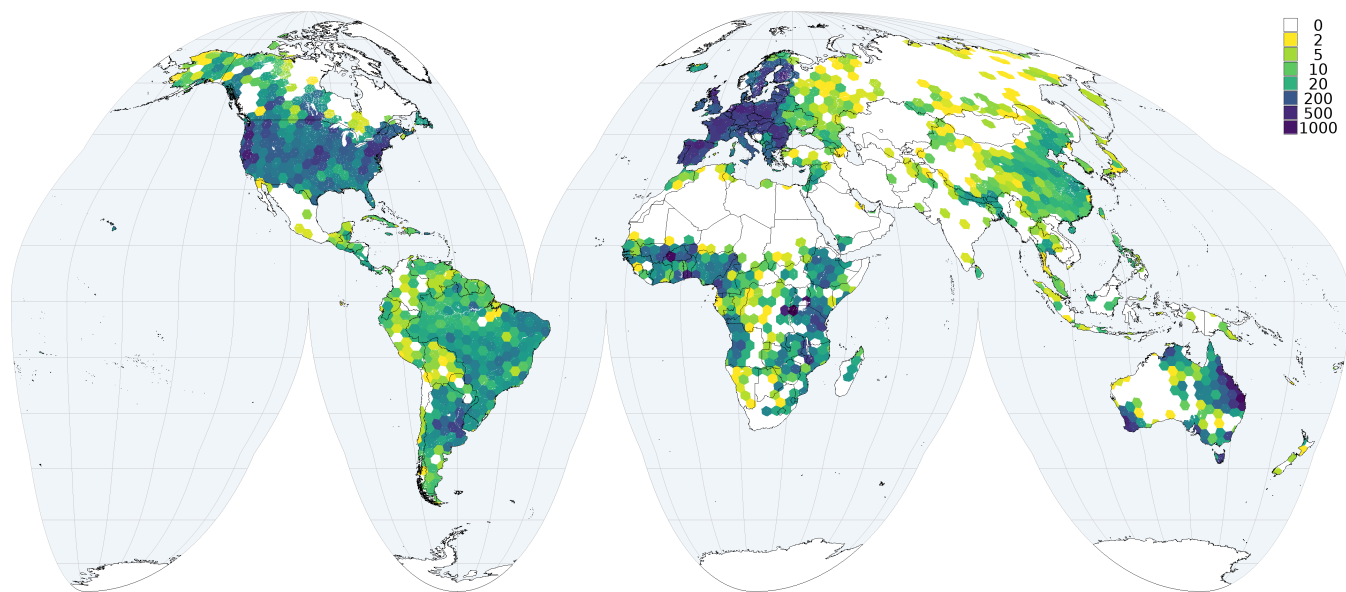

**Figure S3.** Number of observations for soil nitrogen content.

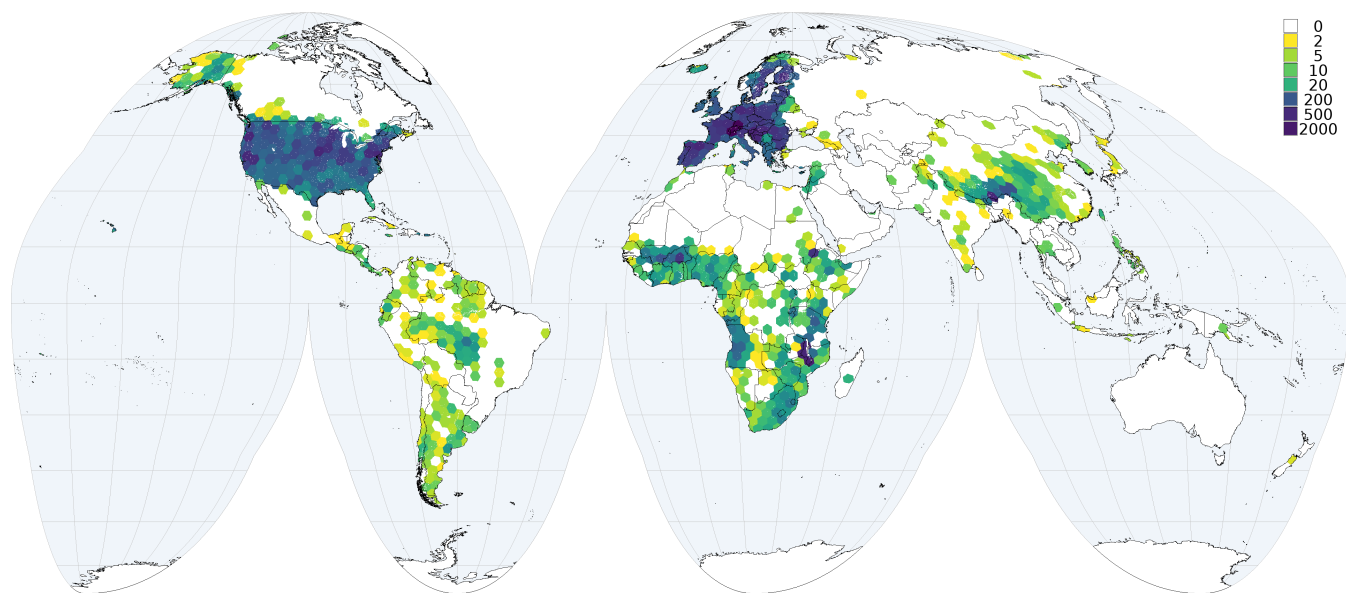

**Figure S4.** Number of observations for coarse fragments.

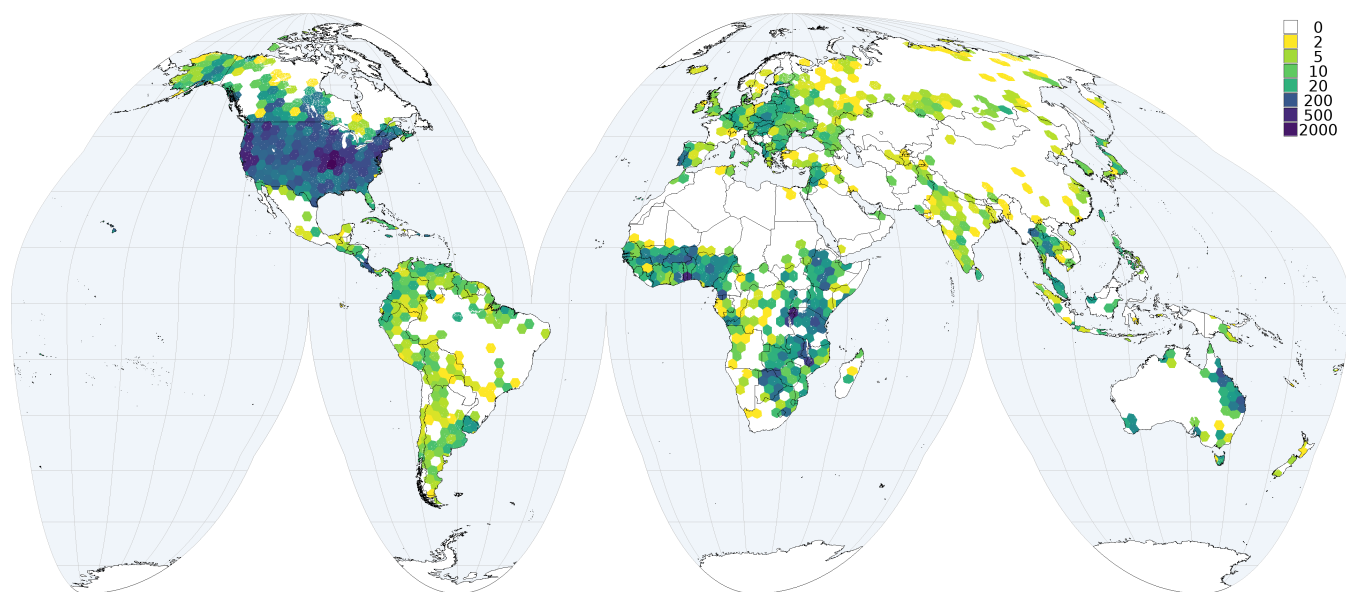

**Figure S5.** Number of observations for cation exchange capacity of the soil.

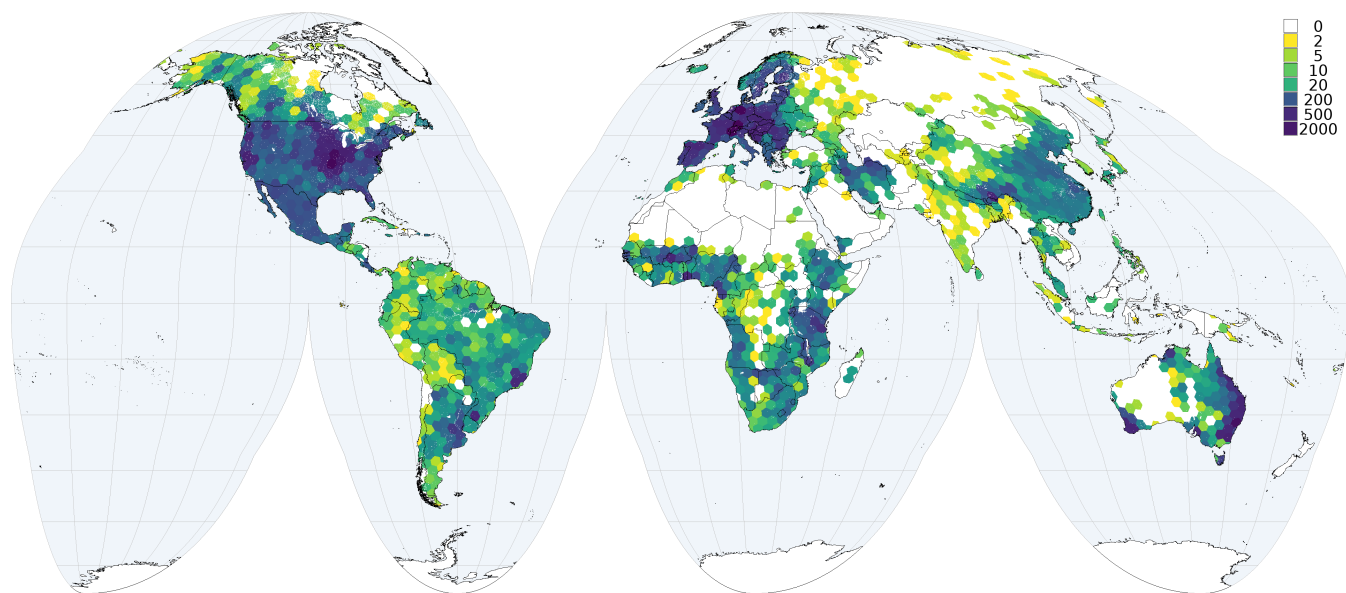

**Figure S6.** Number of observations for texture fractions.

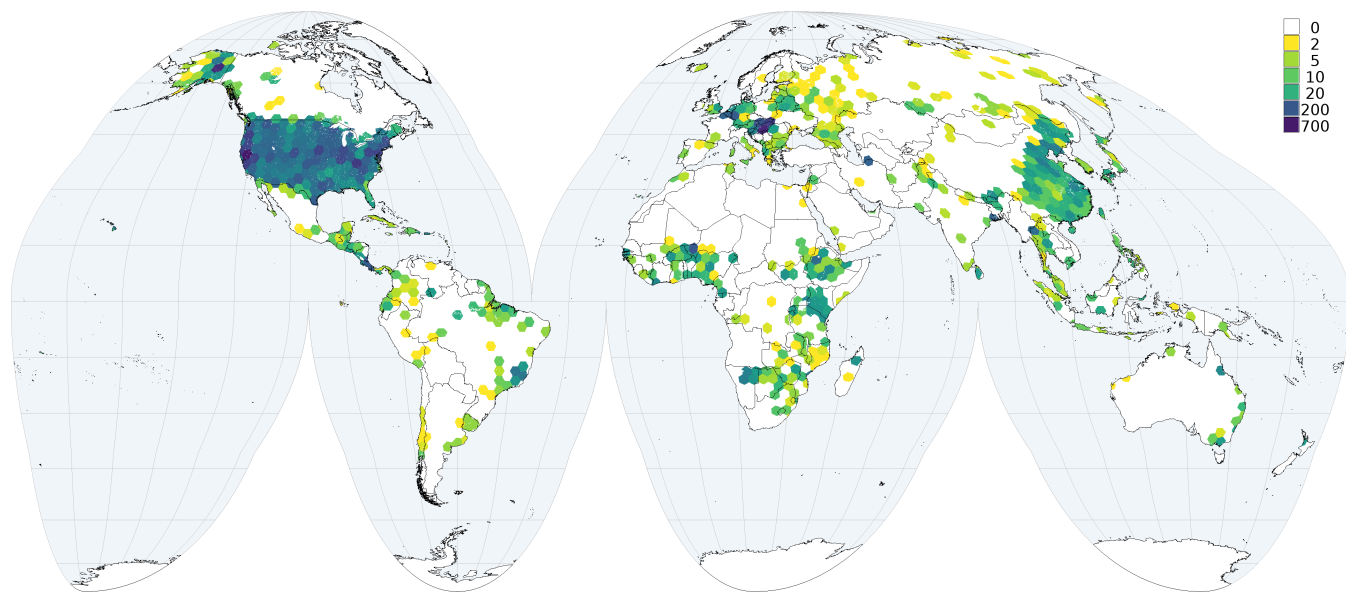

**Figure S7.** Number of observations for bulk density.

## 2 Numerical evaluation (model performance metrics) by bio-climatic region and depth interval

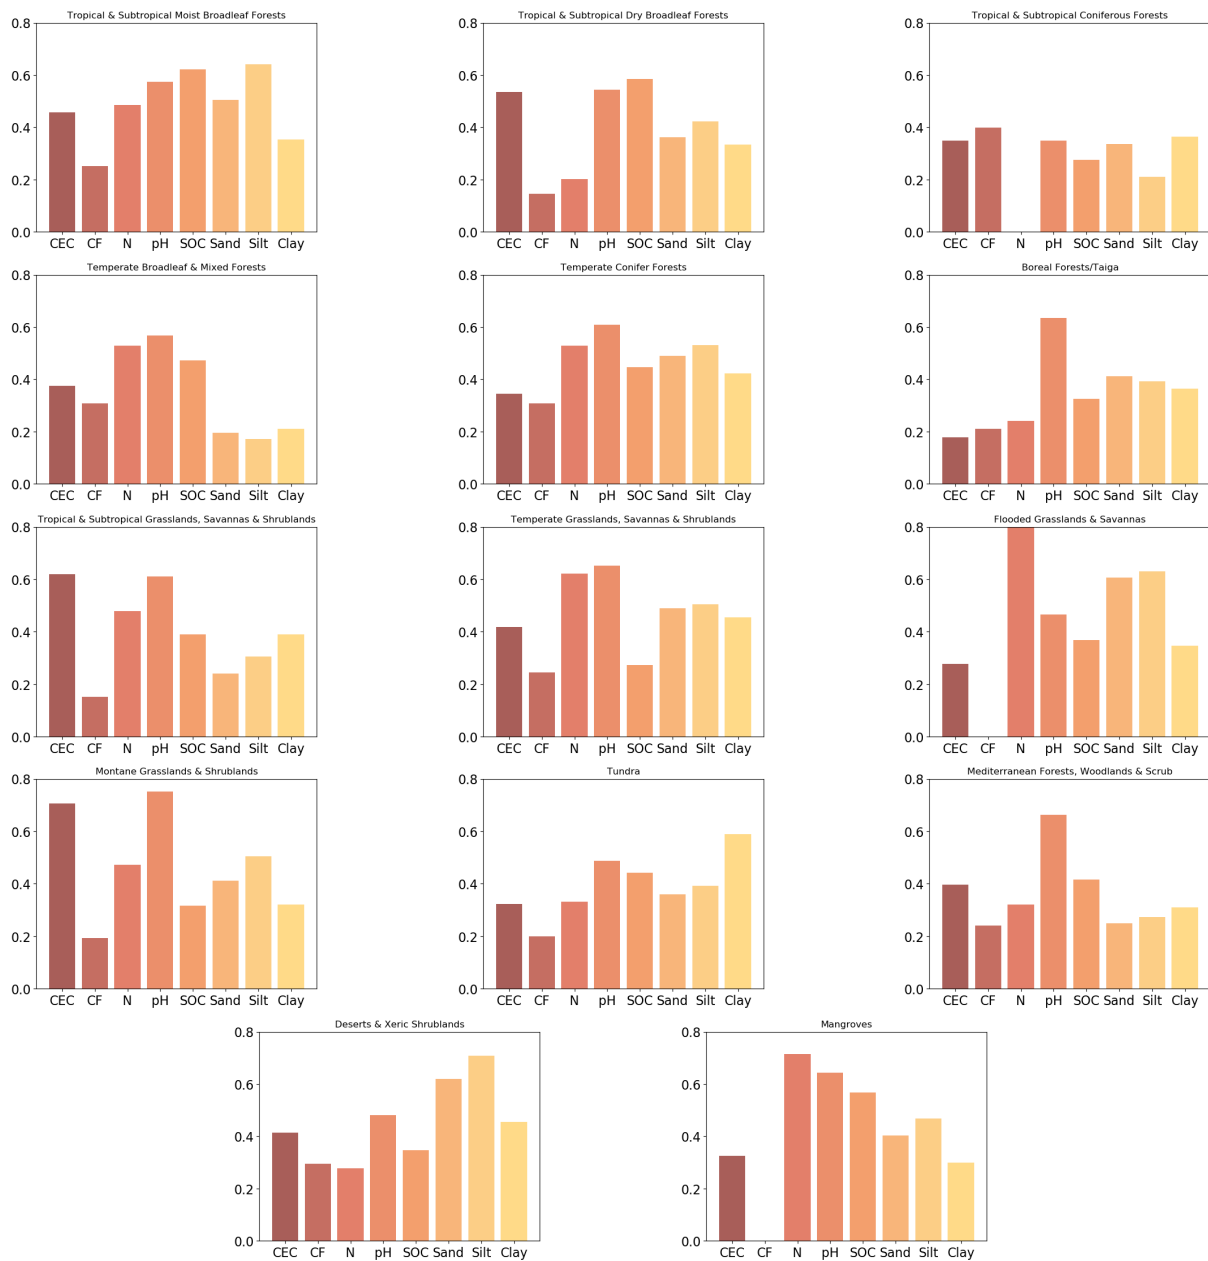

**Figure S8.** MEC for mean predictions by bio-climatic region.

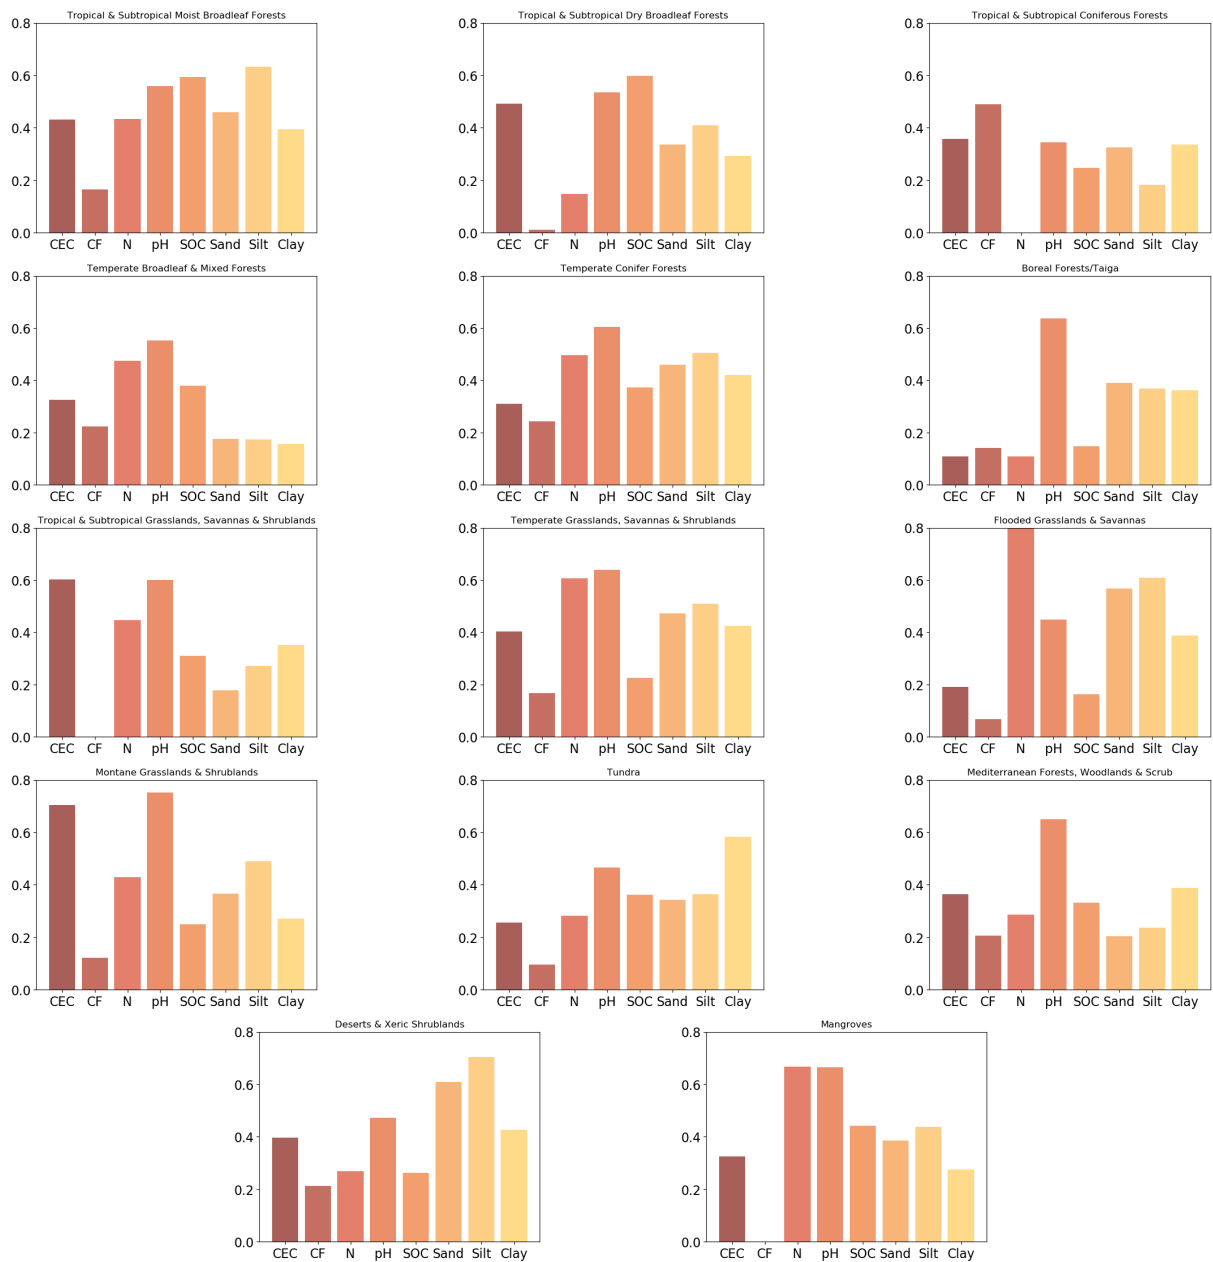

**Figure S9.** MEC for median predictions by bio-climatic region.

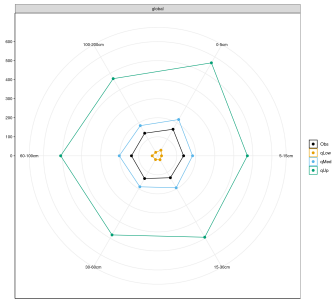

(a) Cation Exchange Capacity

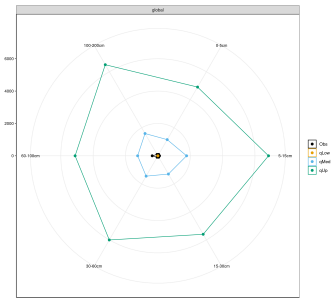

(b) Coarse Fragments

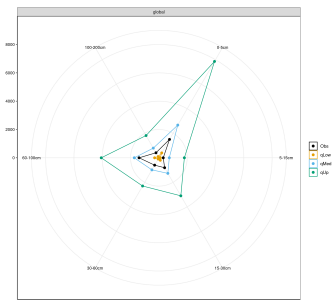

(c) Nitrogen

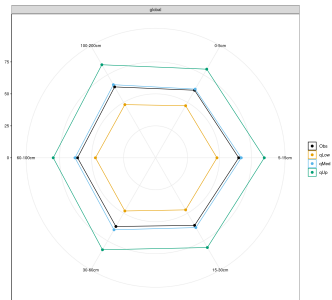

(d) Soil pH

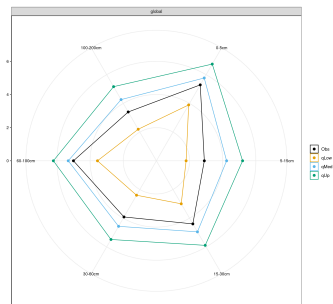

(e) Soil Organic Carbon

**Figure S10.** Summary statistics of the maps by standard depth interval compared with observed values for the corresponding interval.
